# Supplementary material
Source: PubMed Central journal article supplement (PMC6345375)
Supplement: NIHMS78630-supplement-Reporting_Summary.pdf [file NIHMS78630-supplement-Reporting_Summary.pdf]

## Reporting Summary

Nature Research wishes to improve the reproducibility of the work that we publish. This form provides structure for consistency and transparency in reporting. For further information on Nature Research policies, see [Authors & Referees](#) and the [Editorial Policy Checklist](#).

### Statistical parameters

When statistical analyses are reported, confirm that the following items are present in the relevant location (e.g. figure legend, table legend, main text, or Methods section).

n/a | Confirmed

- The exact sample size ( $n$ ) for each experimental group/condition, given as a discrete number and unit of measurement
- An indication of whether measurements were taken from distinct samples or whether the same sample was measured repeatedly
- The statistical test(s) used AND whether they are one- or two-sided  
*Only common tests should be described solely by name; describe more complex techniques in the Methods section.*
- A description of all covariates tested
- A description of any assumptions or corrections, such as tests of normality and adjustment for multiple comparisons
- A full description of the statistics including central tendency (e.g. means) or other basic estimates (e.g. regression coefficient) AND variation (e.g. standard deviation) or associated estimates of uncertainty (e.g. confidence intervals)
- For null hypothesis testing, the test statistic (e.g.  $F$ ,  $t$ ,  $r$ ) with confidence intervals, effect sizes, degrees of freedom and  $P$  value noted  
*Give  $P$  values as exact values whenever suitable.*
- For Bayesian analysis, information on the choice of priors and Markov chain Monte Carlo settings
- For hierarchical and complex designs, identification of the appropriate level for tests and full reporting of outcomes
- Estimates of effect sizes (e.g. Cohen's  $d$ , Pearson's  $r$ ), indicating how they were calculated
- Clearly defined error bars  
*State explicitly what error bars represent (e.g. SD, SE, CI)*

*Our web collection on [statistics for biologists](#) may be useful.*

### Software and code

Policy information about [availability of computer code](#)

Data collection

Data was acquired using software supplied by instrument manufacturer (ZEISS ZEN 2011) or the open source software  $\mu$ manager (Version 1.4): *Journal of Biological Methods* 2014 1(2):e11 doi:10.14440/jbm.2014.36

Data analysis

Open source software Fiji (distribution of ImageJ) was used to process confocal imaging data, it was described in the following publication: *Nature methods* 9(7): 676-682, PMID 22743772, doi:10.1038/nmeth.2019. Custom analysis software Picasso was used to process raw super-resolution data. The software is open source and was described in detail in the following publication: *Nature Protocols* volume 12, pages 1198–1228 (2017) doi:10.1038/nprot.2017.024.

For manuscripts utilizing custom algorithms or software that are central to the research but not yet described in published literature, software must be made available to editors/reviewers upon request. We strongly encourage code deposition in a community repository (e.g. GitHub). See the Nature Research [guidelines for submitting code & software](#) for further information.

### Data

Policy information about [availability of data](#)

All manuscripts must include a [data availability statement](#). This statement should provide the following information, where applicable:

- Accession codes, unique identifiers, or web links for publicly available datasets
- A list of figures that have associated raw data
- A description of any restrictions on data availability

All raw data are available upon request from the authors

## Field-specific reporting

Please select the best fit for your research. If you are not sure, read the appropriate sections before making your selection.

Life sciences  Behavioural & social sciences

For a reference copy of the document with all sections, see [nature.com/authors/policies/ReportingSummary-flat.pdf](https://www.nature.com/authors/policies/ReportingSummary-flat.pdf)

## Life sciences

### Study design

All studies must disclose on these points even when the disclosure is negative.

Sample size Localization precision for EGFR imaging experiments were calculated from around 30,000 labeled proteins.

Data exclusions No data were excluded from analysis

Replication All experiments were reliably reproduced

Randomization No results that require randomization are presented in this study

Blinding n/a since no allocation into groups was performed

### Materials & experimental systems

Policy information about [availability of materials](#)

|                                     |                                                           |
|-------------------------------------|-----------------------------------------------------------|
| n/a                                 | Involvement in the study                                  |
| <input type="checkbox"/>            | <input checked="" type="checkbox"/> Unique materials      |
| <input type="checkbox"/>            | <input checked="" type="checkbox"/> Antibodies            |
| <input type="checkbox"/>            | <input checked="" type="checkbox"/> Eukaryotic cell lines |
| <input checked="" type="checkbox"/> | <input type="checkbox"/> Research animals                 |
| <input checked="" type="checkbox"/> | <input type="checkbox"/> Human research participants      |

#### Unique materials

Obtaining unique materials All unique materials are readily available from the authors or from standard commercial sources (SomaLogic)

#### Antibodies

Antibodies used Primary monoclonal Anti-EGFR antibody: Cell Signaling, cat: 4267S, clone D38B1, Lot: 11, dilution 1:200  
Primary antibody against extracellular region of EGFR: MA5-13319, clone 119.12, Lot: TD2556544B, dilution 1:50  
Primary anti-PMP70 antibody: Abcam, ab211533, clone CL2524, dilution 1:200  
Secondary polyclonal anti-rabbit antibody conjugated to Alexa Fluor 647: Abcam cat: ab150075, dilution 1:200  
Secondary polyclonal AffiniPure Anti-Mouse IgG antibody: Jackson ImmunoResearch cat: 115-005-003

Validation All antibodies were validated for IF and human species reactivity by the manufacturer according to their websites.

#### Eukaryotic cell lines

Policy information about [cell lines](#)

Cell line source(s) A431, A549, and SK-BR-3 cells were purchased from ATCC. mEGFP-Nup107 HeLa Kyoto was obtained from the Ellenberg lab (Reference Otsuka, S. et al. Elife 5 (2016))

Authentication

Cell lines were not authenticated

Mycoplasma contamination

All cell lines were tested negative for mycoplasma contamination

Commonly misidentified lines  
(See [ICLAC](#) register)

No commonly misidentified cell lines were used

## Method-specific reporting

---

- | n/a                                 | Involvement in the study                            |
|-------------------------------------|-----------------------------------------------------|
| <input checked="" type="checkbox"/> | <input type="checkbox"/> ChIP-seq                   |
| <input checked="" type="checkbox"/> | <input type="checkbox"/> Flow cytometry             |
| <input checked="" type="checkbox"/> | <input type="checkbox"/> Magnetic resonance imaging |
