# Supplementary material
Source: PubMed Central journal article supplement (PMC6345375)
Supplement: NIHMS78630-supplement-Supplementary_Tables.pdf [file NIHMS78630-supplement-Supplementary_Tables.pdf]

## Supplementary Tables

**Supplementary Table 1 | SOMAmer reagents**

| SOMAmer reagent     | Target       | Design/Modifications                       | Base Count | MW (kDa) | K <sub>d</sub> (nM) |
|---------------------|--------------|--------------------------------------------|------------|----------|---------------------|
| Cyanine-3-P1-SL1070 | GFP          | Cy3-5'-ATACATCTA-TT-SOMAmer-3'-inverted-dT | 50         | 21.0     | 0.2                 |
| Cyanine-3-P1-SL1069 | EGFR (ERBB1) | Cy3-5'-ATACATCTA-TT-SOMAmer-3'-inverted-dT | 50         | 21.6     | 1.6                 |
| P1-SL1069           | EGFR (ERBB1) | 5'-ATACATCTA-TT-SOMAmer-3'-inverted-dT     | 50         | 21.1     | 1.4                 |
| FI-SL1071-P5        | Catalase     | Fluorescein-5'-SOMAmer-TT-TCAATGTAT-3'     | 50         | 20.5     | 0.1                 |
| FI-SL1072-P3        | LIMP2        | Fluorescein-5'-SOMAmer-TT-TCTTCATTA-3'     | 50         | 20.8     | 40                  |
| P1-SL1073           | HSP60        | 5'-ATACATCTA-TT-SOMAmer-3'-inverted-dT     | 74         | 28.4     | 3                   |
| FI-SL1074-P6        | HSP90a/b     | Fluorescein-5'-SOMAmer-TT-TTAGGTA-3'       | 50         | 21.0     | 2                   |
| FI-SL1075-P3        | ErbB2        | Fluorescein-5'-SOMAmer-TT-TCTTCATTA-3'     | 50         | 17.4     | 10                  |

**Supplementary Table 2 | Tested SOMAmer reagents for PFA and methanol fixation protocol**

| Target                          | SOMAmer ID          | PFA fixation | Methanol fixation |
|---------------------------------|---------------------|--------------|-------------------|
| EGFR                            | P1-SL1069           | +            | +                 |
| EGFR                            | Cyanine-3-P1-SL1069 | +            | +                 |
| ErbB2                           | FI-SL1075-P3        | +            | +                 |
| ErbB2                           | FI-SL1081-P3        | -            | -                 |
| ErbB2                           | SL1082-P3           | +            | +                 |
| HSP90a/b                        | FI-SL1074-P6        | +            | +                 |
| LIMP2                           | FI-SL1072-P3        | +            | -                 |
| HSP60                           | P1-SL1073           | Low signal   | +                 |
| HSP60                           | Cyanine-3-P1-SL1076 | Low signal   | +                 |
| Catalase                        | FI-SL1071-P5        | +            | -                 |
| Calreticulin                    | FI-SL1077-P6        | -            | -                 |
| LaminB                          | FI-SL1078-P3        | Low signal   | Not tested        |
| GTP-binding nuclear protein Ran | FI-SL1079-P5        | -            | -                 |
| DnaJ homolog TIM14              | FI-SL1080-P3        | -            | -                 |
| GFP                             | Cyanine-3-P1-SL1070 | +            | Not tested        |

## Supplementary Notes

### Supplementary Note 1: Use of polyanionic competitors during staining

The addition of competitors during the SOMAmer staining reaction can help to reduce non-specific binding and thus improve the signal-to-noise ratio. Although SOMAmers typically have very high, antibody-like affinities to their targets, cells contain many proteins with a modest nonspecific affinity towards the SOMAmers, such as highly abundant plasma proteins that can bind DNA. Another source of non-specific SOMAmer binding is electrostatic attraction of the polyanionic aptamers to positively charged regions of some proteins, such as histones in the nucleus. Here, we used two different competitors simultaneously: The first is low molecular weight dextran sulfate (6.5–10 kDa), typically used during SOMAmer selection as kinetic challenger, which has been shown to reduce nonspecific binding in cell staining<sup>1</sup>. High concentrations of dextran sulfate drastically decreased off-target binding of the SOMAmers in the nucleus (**Supplementary Figure 11**). The second competitor we used is a DNA-based polyanionic competitor named Z-Block (SomaLogic). Z-Block contains the modified nucleotides (Bn-dU) as some of the SOMAmers (30-mer, [5'-AC[Bn-dU]<sub>2</sub>]<sub>7</sub>AC-3']) and strongly reduces intracellular off-target interactions of the SOMAmers. An increase in the Z-Block concentration led to a highly improved signal-to-noise level (**Supplementary Figure 12**). The optimum concentration of competitors was evaluated for every SOMAmer construct individually. We found that a molar excess of 1,000 times for Z-Block and 10,000 times for dextran sulfate are a good starting point to reduce unspecific binding to a minimum and to obtain the maximum signal for specific staining at the same time.

### Supplementary Note 2: Live-cell staining and DNA-PAINT single-particle-tracking

We tested if it is possible to use SOMAmers to label the extracellular EGFR in living A431 cells. We observed efficient membrane staining after 20 min of incubation at 4°C with the SOMAmers diluted in L-15 cell medium supplemented with 10 µM Z-Block (**Supplementary Figure 13b**). We show successful EGFR SOMAmer labeling with downstream fixation (4% PFA, 30 min), permeabilization and immunostaining of intracellular EGFR using primary and secondary antibodies. Co-localization of SOMAmer and antibody signal shows the specificity of the EGFR SOMAmer. We tested potential non-specific binding of the SOMAmers on living cells by using the GFP-SOMAmer as a negative staining control in A431 cells (**Supplementary Figure 13a**) and observed a low amount of non-specific binding, which could be efficiently reduced by the addition of 10 µM Z-Block.

## Supplementary Methods

### Secondary antibody conjugation to DNA

Anti-mouse secondary antibody was conjugated to a DNA-PAINT docking site (Thiol-5'-TTATACATCTA-3') using maleimide-PEG2-succinimidyl ester<sup>2,3</sup>.

### Supplementary Figure 1

SK-BR-3 cells were fixed in pre-warmed (to 37°C) 4% paraformaldehyde in PBS for 15 min at room temperature, then washed twice with PBS and permeabilized with 0.25% Triton-X-100 in PBS for 15 min. The folded SOMAmer reagents against EGFR, ErbB2 and HSP90 were diluted to 100 nM in SOMAmer staining buffer (1×PBS, 5 mM MgCl<sub>2</sub>, 1% BSA, 0.05% Tween-20, 0.1 mg/ml sheared salmon sperm DNA, 10 μM Z-Block, 1 mM dextran sulfate) and incubated with the cells overnight at 4°C. After SOMAmer incubation, the cells were washed three times with PBS + 5 mM MgCl<sub>2</sub>. Post-fixation was performed using 4% paraformaldehyde in PBS + 5 mM MgCl<sub>2</sub> for 10 min at room temperature, then washed three times with PBS + 5 mM MgCl<sub>2</sub>.

### Imaging conditions

| Imaging round | Imager strand   | Imager concentration | Frames | Integration time | Laser power density     |
|---------------|-----------------|----------------------|--------|------------------|-------------------------|
| 1. ErbB2      | TAATGAAGA-Cy3b  | 0.75 nM              | 23,177 | 250 ms           | 0.83 kW/cm <sup>2</sup> |
| 2. EGFR       | Cy3b-TAGATGTAT  | 3 nM                 | 23,512 | 250 ms           | 0.83 kW/cm <sup>2</sup> |
| 3. HSP90      | CTTTACCTAA-Cy3b | 0.5 nM               | 30,000 | 250 ms           | 0.83 kW/cm <sup>2</sup> |

A cylindrical lens was used for 3D astigmatism imaging.

### Supplementary Figure 2

SK-BR-3 cells were fixed with -20°C 100% methanol for 5 min at room temperature, then, washed three times with PBS. The folded SOMAmer reagents were diluted to 100 nM in SOMAmer staining buffer (1× PBS, 5 mM MgCl<sub>2</sub>, 1% BSA, 0.05% Tween-20, 0.1 mg/ml sheared salmon sperm DNA, 10 μM Z-Block, 1 mM dextran sulfate) and incubated with the cells overnight at 4°C. After SOMAmer incubation, the cells were washed three times with PBS + 5 mM MgCl<sub>2</sub>. Post-fixation was performed using 4% paraformaldehyde in PBS + 5 mM MgCl<sub>2</sub> for 10 min at room temperature followed by washing three times with PBS + 5 mM MgCl<sub>2</sub>.

### Imaging conditions

| Imaging round | Imager strand  | Imager concentration | Frames | Integration time | Laser power density     |
|---------------|----------------|----------------------|--------|------------------|-------------------------|
| 1. LIMP2      | TAATGAAGA-Cy3b | 1.5 nM               | 20,000 | 250 ms           | 0.41 kW/cm <sup>2</sup> |
| 2. HSP60      | Cy3b-TAGATGTAT | 0.3 nM               | 40,000 | 250 ms           | 0.62 kW/cm <sup>2</sup> |

A cylindrical lens was used for 3D astigmatism imaging.

### Supplementary Figures 6 and 7

Prior to fixation, A431 (Supp. Figure 6) or A549 (Supp. Figure 7) cells were serum depleted overnight and treated with 80 μM endocytosis inhibitor Dynasore (Sigma Aldrich, SML0340) for ~30 min. Cells were fixed with ice-cold 4% paraformaldehyde in PBS for 30 minutes at room temperature, then washed two times with PBS and permeabilized with 0.25% Triton-X-100 for 15 min.

SOMAmer staining: The folded SOMAmer against EGFR was diluted to 100 nM in SOMAmer staining buffer (1×PBS, 5 mM MgCl<sub>2</sub>, 1% BSA, 0.05% Tween-20, 0.1 mg/ml salmon sperm DNA, 10 μM Z-Block, 1 mM dextran sulfate) and incubated with the cells overnight at 4°C. After SOMAmer incubation, the cells were washed three times with PBS + 5 mM MgCl<sub>2</sub>. Post-fixation was performed using 1% paraformaldehyde and 0.1% glutaraldehyde in PBS + 5 mM MgCl<sub>2</sub> for 10 min at room temperature followed by washing three times with PBS + 5 mM MgCl<sub>2</sub>.

EGFR immunostaining: Cells were blocked with 3% BSA in PBS for 60 min at room temperature. Primary antibody against the extracellular region of EGFR (Thermo Fisher, MA5-13319) was diluted (1:50) in 3% BSA in PBS and incubated with the cells overnight at 4°C. Cells were rinsed with PBS and washed three times with an incubation time of 5 min. Secondary anti-mouse antibody conjugated to a P1 docking site was diluted in 3% BSA in PBS and incubated with the cells for 1 h at room temperature. Cells were rinsed with PBS and washed three times with an incubation time of 5 min. Post-fixation was performed using 1% paraformaldehyde and 0.1% Glutaraldehyde in PBS + 5 mM MgCl<sub>2</sub> for 10 min at room temperature followed by washing three times with PBS + 5 mM MgCl<sub>2</sub>.

#### Imaging conditions for Supplementary Figure 6:

|          | Imager strand   | Imager concentration | Frames | Integration time | Laser power density    |
|----------|-----------------|----------------------|--------|------------------|------------------------|
| SOMAmer  | Cy3b-TAGATGTAT  | 1.2 nM               | 50,000 | 150 ms           | 1.9 kW/cm <sup>2</sup> |
| Antibody | CTAGATGTAT-Cy3b | 0.25 nM              | 50,000 | 150 ms           | 1.9 kW/cm <sup>2</sup> |

For analysis, ~20,000 – 30,000 single EGFR proteins were selected and analyzed using Picasso's pick tool with a radius of 65 nm (adjusted to the experimental localization precision in order to fully select single receptors).

#### Imaging conditions for Supplementary Figure 7:

|          | Imager strand | Imager concentration | Frames | Integration time | Laser power density     |
|----------|---------------|----------------------|--------|------------------|-------------------------|
| SOMAmer  | AGATGTAT-Cy3b | 15 nM                | 40,000 | 100 ms           | 0.41 kW/cm <sup>2</sup> |
| Antibody | AGATGTAT-Cy3b | 2.5 nM               | 40,000 | 100 ms           | 0.41 kW/cm <sup>2</sup> |

For analysis, ~3,000 single EGFR proteins were selected and analyzed using Picasso's pick tool with a radius of ~90 nm (adjusted to the experimental localization precision in order to fully select single receptors).

#### Supplementary Figure 8

##### Imaging conditions:

| Imaging Round | Imager strand   | Imager concentration | Frames | Integration time | Laser power density     |
|---------------|-----------------|----------------------|--------|------------------|-------------------------|
| 1. Catalase   | CATACATTGA-Cy3b | 1 nM                 | 30,000 | 250 ms           | 0.83 kW/cm <sup>2</sup> |
| 2. PMP70      | CTAGATGTAT-Cy3b | 0.3 nM               | 30,000 | 200 ms           | 1.2 kW/cm <sup>2</sup>  |

A cylindrical lens was used for 3D astigmatism imaging.

#### Supplementary References

1. Gupta, S. et al. *Appl Immunohisto M M* **19**, 273-278 (2011).
2. Agasti, S.S. et al. *Chem Sci* **8**, 3080-3091 (2017).
3. Schnitzbauer, J., Strauss, M.T., Schlichthaerle, T., Schueder, F. & Jungmann, R. *Nat Protoc* **12**, 1198-1228 (2017).
